# Supplementary material for: Variation in the skulls of Elgaria and Gerrhonotus (Anguidae, Gerrhonotinae) and implications for phylogenetics and fossil identification
Source: PeerJ. 2021 Jul 22;9:e11602. doi: 10.7717/peerj.11602 (PMC8310624; doi:10.7717/peerj.11602)
Supplement: Supplemental Information 1 [file peerj-09-11602-s001.xlsx]

## Sheet: Sheet1
Genus	Species	subspecies	Collection	Specimen number	sex	SVL (mm)	specimen type	locality	1	2	3	4	5	6	7	8	9	10	11	12	13	14	15	16	17	18	19	20	21	22	23	24	25	26	27	28	29	30	31	32	33	34	35	36	37	38	39	40	41
Elgaria	cedrosensis		SDNHM	30296	?	83		Isla de Cedros, Baja California, Mexico	0	0	0	9	0	0	2-L,1-R	0	20-L,20-R	5-L,6-R	2-L,3-R	0	0	0	0	1	0	1	1	1	0	0	1	2-L,3-R	1	0	0	1	0	0	1	0	0-L,1-R	1	0	0	0	0	0	1	1-L,0-R
Elgaria	cedrosensis		SDNHM	27702	?	73		Isla de Cedros, Baja California, Mexico	0	0	0	9	0	0	2-L,3-R	0	19-L,19-R	6-L,6-R	2-L,2-R	0	0	0	1-L, 0-R	1	0	1	1	1	0	0	1	3-L,2-R	1	0	0	1-L,2-R	0	0	1	0	0	1	0	0	0	0	0	1	0
Elgaria	coerulea	coerulea	CAS	14509	?	?		San Francisco Co. Ca	?	1	1	9	?	0	2-L,1-R	0	18-L,18-R	7-L,6-R	?	0	?	?	0	1	0	1	?	1	0	?	1	1-L,1-R	0	0	0	1	0	0	1	0	0	1	0	0	0	0	0	0	0
Elgaria	coerulea		UF	152969	?	?		Rogue River National Forest, Siskiyou Co. CA	0	0	1	9	0	0	1-L,1-R	0	19-L,20-R	4-L,4-R	?	0	0	?	0	0	0	0	?	1	0	?	1	2-L,1-R	0	1	0	2	0	0	1	0	0	?	0	0	0	0	0	1	0
Elgaria	coerulea		TxVP	M-9008	Female	114		Humbolt Co. CA	?	1	1	9	?	?	?	0	19-L,18-R	5-L,5-R	?	?	?	?	1	1	0	0	?	1	0	?	1	2-L,?-R	0	0	0	1	?	1	1	?	?	1	?	?	?	?	0	0	0
Elgaria	coerulea		TxVP	M-8977	?	98		Mendocino Co. CA	?	?	?	?	?	?	?	?	?	?	?	?	?	?	?	?	?	?	?	?	?	?	?	?	?	?	?	2	0	?	?	?	?	?	?	?	?	?	0	?	0
Elgaria	coerulea		TNHC	14643	?	94		Humboldt Co. CA	0	0	1	8	0	0	2-L,2-R	0	20-L,19-R	6-L,6-R	1-L, 2-R	1	0	0	0	1	0	0	0	1	0	0	1	1-L,2-R	1	1	1-L,0-R	2	0	0	1	0	0	1	0	0	0	0-L,1-R	0	0	0
Elgaria	coerulea		TNHC	58792	?	94		Benton Co. CA	0	0	1	9	0	0	1-L,1-R	0	18-L,18-R	7-L,5-R	2-L, 1-R	0	0	0	0	1	0	0	0	0	0	0	1	1-L,1-R	0	0	0	1	0	0	1	1	0	1	0	0	0	0	0	1-L, 0-R	0
Elgaria	coerulea		TxVP	M-8965	?	74		21.6 mi W of Castle Crags State Park; Trinity Co. CA	0	0	1	9	?	0	?	0	16-L,17-R	4-L,5-R	?	0	?	?	1	1	0	?	?	1	0	?	1	1-L,1-R	0	1	0	2	0	1	1	?	?	1	0	0	0	0	0	0	0
Elgaria	kingii		CAS	266265	?	?		N/A	?	0	0	9	?	0	1-L,1-R	0	19-L,18-R	6-L,7-R	?	0	?	?	0	1	0	0	?	1	0	?	1	2-L,2-R	0	0	0-L,1-R	2	0	0	1	0	1	?	0	0	0	0	0	1	0
Elgaria	kingii		UF	74645	?	?		Cochise Canyon, Rincon Mts, Exit 297 off Interstate 10, Mescel Road. Cochise Co., AZ	0	2	1	9	0	0	2-L,2-R	0	21-L,22-R	7-L,7-R	2-L,2-R	0	0	0	0	1	?	0	?	0	?	?	1	1-L, 1-R	0	0	0	1-L,2-R	0	1	1	?	1	?	0	0	0	0	0	1	0
Elgaria	kingii		TxVP	M-8981	?	96		Catalina Ms.; Tucson Pima Co. AZ	?	2	1	9	0	?	2-L,2-R	0	20-L,20-R	4-L,5-R	2-L,2-R	0	?	?	?	1	?	0	0	?	?	?	1	?-L, 2-R	?	?	0	2	0	?	?	?	?	?	0	0	0	0	0	?	0
Elgaria	kingii		SDNHM	27895	?	95		Coconino, AZ	0	1	1	9	0	0	2-L,1-R	0	21-L,22-R	5-L,5-R	2-L,2-R	1	0	0	0	1	0	0	1-L,0-R	1	0	0	1	2-L,2-R	0	0	0	2	1-L,0-R	0	1	0	0-L,1-R	1	0	0	0	1	0	1	0
Elgaria	kingii		SDNHM	24252	?	86		Mimbres near Water Canyon, NM	0	2	1	10	0	0	2-L,2-R	0	20-L,22-R	6-L,7-R	2-L,2-R	0	0	0	0	1	0	0	0	1	0	1	1	2-L,0-R	0	1	0	2	0	0	1	0	0	1	0	0	0	0	0	1	0
Elgaria	kingii		TxVP	M-8582	?, juvenile	75		N/A	?	0	1	9	0	?	1-L,2-R	0	18-L,18-R	6-L,6-R	2-L,3-R	0	?	?	?	1	?	0	0	1	0	0	1	1-L,2-R	?	?	0	2	0	?	?	?	?	?	0	0	0	0	0	?	0
Elgaria	multicarinata	multicarinata	CAS	54241	?	?		Santa Clara Co. CA	?	0	1	9	?	0	1-L,1-R	0	20-L,20-R	6-L,6-R	?	1	?	?	1	1	0	0	?	1	0	?	1	1-L,1-R	0	1	0	2	0	1	1	?	?	1	0	0	0	0	0	1	0
Elgaria	multicarinata	multicarinata	TxVP	M-8990	?	?		Saddle Mountain; Clatsop Co. Oregon	?	1	1	9	0	0	?	?	18-L,19-R	6-L,6-R	?	0	?	?	0	0	0	0	?	0	0	?	1	1-L,2-R	0	0	0	1	0	1	1	?	?	1	0	0	0	0	0	0	0
Elgaria	multicarinata	webbii	TxVP	M-8993	?	157		Riverside Co. CA	?	2	1	9	0	?	2-L,2-R	0	22-L,21-R	6-L,7-R	2-L,2-R	0	?	?	?	1	?	0	1	?	?	?	L-1, R-0	2-L,1-R	?	?	0	2	0	?	?	0	0	1	0	0	0	0	0	?	0
Elgaria	multicarinata	webbii	TxVP	M-8975	Female	153		Riverside Co. CA	?	?	?	9	?	?	?	0	19-L,19-R	6-L,7-R	?	?	?	?	1	1	1	0-L,1-R	?	1	1	?	1	2-L,1-R	0	1	0	2	?	1	1	0	0	1	?	0	0	0	0	0	0
Elgaria	multicarinata	webbii	TxVP	M-8991	?	153		Riverside Co. CA	?	0	1	?	?	?	?	0	?	?	?	1	?	?	?	?	?	?	0	?	?	?	1	1-L,1-R	?	?	1	2	0	?	?	?	?	?	?	?	?	?	0	?	0
Elgaria	multicarinata	webbii	TxVP	M-9007	Female	143		Riverside Co. CA	?	?	1	9	?	?	?	0	21-L,20-R	6-L,?-R	?	?	?	?	1	0	0	0	?	?	0	?	1	3-L,2-R	0	1	0	2	?	1	1	0	?	?	?	?	?	?	0	1	0
Elgaria	multicarinata	webbii	TNHC	35666	?	127		Los angeles, CA	0	0	1	9	0	0	1-L,2-R	0	20-L,20-R	5-L,5-R	3-L,2-R	1	0	0	1	1	0	0	0	1	0	0	1	2-L,1-R	0	1	0	2	0	1	1	0	0	1	0	1	0	1	0	0	0
Elgaria	multicarinata	webbii	TxVP	M-8986	?	117		San Bernardino Co., CA	?	0	1	?	0	?	?	0	?	?	?	?	?	?	?	0	?	0	?	?	?	?	1	?-L,2-R	?	?	0	2	0	?	?	?	?	?	?	?	?	?	0	?	0
Elgaria	multicarinata	webbii	TxVP	M-9005	Female	115		Riverside Co. CA	?	0	1	9	?	0	1-L,1-R	0	18-L,17-R	6-L,6-R	?	1	?	?	1	0	0	0	?	0	0	?	1	2-L,1-R	0	1	0	2	0	1	1	0	1	1	?	?	?	?	0	1	0
Elgaria	multicarinata	webbii	TxVP	M-8992	?	112		San Bernardino Co., CA	?	0	1	9	0	?	1-L,1-R	0	19-L,19-R	6-L,7-R	2-L,2-R	0-L,R-1	?	?	?	1	?	0	0	1	0	0	1	1-L,2-R	?	?	1	2	0	?	?	0	1	1	0	0	0	0	0	?	0
Elgaria	multicarinata	multicarinata	TxVP	M-9004	?	111		Alameda Co. CA	?	0	?	8	?	?	?	0	18-L,19-R	6-L,5-R	?	?	?	?	1	1	?	0	?	1	0	?	?	?	1	?	?	2	?	0	1	0	?	1	?	?	?	?	0	0	0
Elgaria	multicarinata	webbii	TxVP	M-8974	?	107		Los Angeles Co. CA	?	?	1	9	?	?	?	0	20-L,18-R	5-L,5-R	?	?	?	?	1	0	1	0	?	1	0	?	?	?	0	0	0	2	?	1	1	?	?	?	0	0	0	0	0	0	0
Elgaria	multicarinata		TxVP	M-8987	?	106		N/A	?	0	1	9	0	?	2-L,1-R	0	18-L,18-R	7-L,6-R	2-L,2-R	0	?	?	?	1	?	0	0	?	?	?	1	?-L,2-R	?	?	0	2	0	?	?	?	?	?	0	0	0	0	0	?	0-L,1-R
Elgaria	multicarinata	webbii	TxVP	M-8988	?	105		Santa Barbara Co. CA	?	0	1	10	0	?	1-L,1-R	0	19-L,19-R	7-L,6-R	2-L,2-R	1	?	?	?	1	?	0	1	1	0	0	1	2-L,1-R	?	?	0	2	0	?	?	?	?	?	0	0	0	0	0	?	0
Elgaria	multicarinata	webbii	TNHC	4478	?	98		Los angeles, CA	0	0	1	9	0	0	1-L,2-R	0	18-L,18-R	7-L,8-R	3-L,3-R	1	0	0	0	1	0	0	0	1	0	0	1	3-L,3-R	0	0	0	2-L,1-R	0	0	1	0	0	1	0	0	0	0	0	0	0
Elgaria	multicarinata	multicarinata	TxVP	M-12129	?	93		Oregon	?	0	1	9	0	?	1-L,2-R	0	18-L,18-R	7-L,8-R	2-L, 3-R	1	?	?	?	1	?	0	0	?	?	?	1	1-L,2-R	?	?	0	1	0	?	?	?	?	?	0	0	0	0	0	?	0
Elgaria	multicarinata	webbii	TxVP	M-8980	?	91		San Bernardino Co., CA	?	0	1	9	?	?	2-L,2-R	0	18-L,17-R	6-L,7-R	2-L,2-R	0	?	?	?	1	?	0	0	?	?	?	1	2-L,1-R	?	?	0	2	0	?	?	0	1	1	0	0	0	0	0	?	0
Elgaria	multicarinata	webbii	TxVP	M-8578	?, juvenile	55		Riverside Co. CA	?	0	1	9	0	?	1-L,1-R	0	14-L,15-R	7-L,6-R	2-L,3-R	0	?	?	?	1	?	0	?	1	0	0	1	1-L,1-R	?	?	0	1	0	?	?	?	?	?	0	0	0	0	0	?	0
Elgaria	multicarinata	webbii	TxVP	M-8982	?, juvenile	46		Riverside Co. CA	?	0	1	9	0	?	1-L,1-R	0	16-L,15-R	6-L,5-R	2-L,2-R	0	?	?	?	1	?	0	?	?	?	?	1	1-L,1-R	?	?	0	1	0	?	?	0	1	1	0	0	0	0	0	?	0
Elgaria	nana		SDNHM	17102	?	100		Islas de Los Coronados North Island, Mexico	0	0	1	9	0	0	1-L,1-R	0	18-L,19-R	6-L,6-R	2-L,2-R	1	0	0	0	0	0	0	0	1	0	0	1	2-L,1-R	1	1	0	2	0	0	1	0	1-L,0-R	1	0-L,1-R	0	0	0	0	1	0
Elgaria	nana		SDNHM	52886	?	95		Islas de Los Coronados North Island, Mexico	0	0	1	9	0	0	1-L,1-R	0	19-L,19-R	6-L,7-R	3-L,3-R	1	0	0	0	0	0	0	0	1	0	0	L-0, R-1	2-L,1-R	1	1	0	2	0	0	1	0	1	1	0	0	0	0	0	1	0
Elgaria	panamintina		MVZ	191076	Male	119		Inyo Co. CA	0	0	0	9	0	0	1-L,1-R	0	18-L,19-R	7-L,7-R	2-L,2-R	1	0	0	1	1	0	0	0	1	0	0	L-0, R-1	2-L,2-R	0	0	1	2	1	0	1	0	1	1	0	0	0	0	0	0	0
Elgaria	panamintina		MVZ	75918	Male	113		Inyo Co. CA	0	0	0	8	0	0	1-L,2-R	0	20-L,21-R	6-L,6-R	2-L,2-R	1	0	0	1	0	0	0	0	1	1	0	1	1-L,2-R	0	1	1	2	1	0	1	0	0-L,1-R	1	0	0	0	0	0	0	0
Elgaria	paucicarinata		SDNHM	45106	?	102		La Laguna, Sierra de La Laguna, Baja California Sur, Mexico	0	0	1	9	0	0	2-L,1-R	0	20-L,20-R	5-L,4-R	2-L,2-R	1	0	0	1	1	0	0	1	0	0	0	1	4-L,3-R	0	1	0	2	1	0	1	0	1	1	0	0	0	0	0	1	0
Elgaria	paucicarinata		SDNHM	45100	?	101		La Laguna, Sierra de La Laguna, Baja California Sur, Mexico	0	0	1	9	0	0	2-L,1-R	0	18-L,18-R	5-L,5-R	2-L,3-R	1	0	0	1	1	0	0	1	0	0	0	1	1-L, 1-R	0	0	0	2	1-L,0-R	0	1	0	0	1	0	0	0	0	0	1	1-L,0-R
Elgaria	velazquezi		SDNHM	68677	Male	120	Paratype	La Cumbre de San Pedro, Baja California Sur, Mexico	0	0	1	9	0	0	1-L,1-R	0	23-L,23-R	8-L,7-R	3-L,2-R	1-L, 0-R	0	0	0	0	0	1	1-L, 0-R	1	0	0	1	2-L,4-R	0	1	0	2	0	0	1	0	1	1	0	0	0	0	0	1	0
Elgaria	velazquezi		SDNHM	68678	Male	103	Paratype	41.5 km NW of Santa Rosalia, Baja California Sur, Mexico	0	0	1	9	0	0	2-L,2-R	0	20-L,20-R	7-L,7-R	3-L,3-R	1	0	0	0	0	0	0	0	1	0	0	1	3-L,2-R	1	0	1	2	0	0	1	0	1	1	0	0	0	0	0	1	0
Gerrhonotus	infernalis		TxVP	M-7129	?	?		Travis Co., TX	?	2	?	9	?	1	?	0	26-L,25-R	6-L,6-R	?	1	?	?	0	0	1	0	?	0	1	0	1	1-L,1-R	0	1	1	1	0	0	1	0	0	1	0	0	0	0	0	0-L,1-R	0
Gerrhonotus	infernalis		TxVP	M-1723	?	?		Travis Co., TX	?	?	?	9	?	?	?	0	23-L,22-R	7-L,7-R	?	?	?	?	1	?	?	?	?	?	1	?	1	1-L,1-R	0	?	0	2	0	?	1	?	?	?	?	?	?	?	0	1	0
Gerrhonotus	infernalis		TxVP	M-11412	?	?		Central TX	?	?	?	9	?	?	?	0	24-L,23-R	7-L,6-R	?	?	?	?	0	0	1	0	?	?	1	?	?	?	0	1	1	2	0	0	1	?	?	1	0	0	0	0	0	0	0
Gerrhonotus	infernalis		TxVP	M-13440	?	165		Austin, TX	?	2	0	?	0	?	1-L,1-R	0	?	7-L,7-R	2-L, 3-R	0	?	?	?	0	?	0	0-L,1-R	1	0	1	1	?	?	?	0	0	0	?	?	0	0	1	0	0	0	0	0	?	0
Gerrhonotus	infernalis		TNHC	18988	?	157		Austin, TX	0	2	0	9	0	1	1-L,1-R	0	21-L,22-R	7-L,7-R	3-L,2-R	0	0	0	0	0	0	0	1	0	1	1	1	5-L,4-R	0	1	1-L,0-R	1	0	0	1	0	0	1	0	0	0	0	0	1	0
Gerrhonotus	infernalis		TxVP	M-12353	Male	155		Austin Wildlife Rescue	?	?	?	9	?	?	?	0	23-L,22-R	?-L,7-R	?	?	?	?	1	0	0	0	?	0	?	1	?	?	0	1	1	2	?	0	1	0	0	?	0	0	0	0	0	1	0
Gerrhonotus	infernalis		TxVP	M-13442	?	150		Austin, TX	?	?	?	10	?	?	?	?	23-L,22-R	7-L,6-R	?	?	?	?	1	?	?	0	?	?	?	?	?	?	0	1	1-L,0-R	1	?	?	1	?	?	?	0	0	0	0	0	0	0
Gerrhonotus	infernalis		TxVP	M-11414	?	?		Central TX	?	?	?	?	?	?	1-L,1-R	0	22-L,22-R	6-L,6-R	2-L,2-R	0	?	?	?	0	?	0	1-L, ?-R	0	1	1	?	?	?	1	?	2	?	?	1	0	0-L,1-R	1	0	0	0	0	0	1	0
Gerrhonotus	infernalis		TxVP	M-11411	?	?		Brewster Co.	?	2	1	9	?	?	?	0	21-L,21-R	8-L,8-R	?	?	?	?	0	1	1	0	?	1	1	?	?	?	0	1	?	1	?	0	1	0	0	1	0	0	0	0	0	1-L, 0-R	0
Gerrhonotus	infernalis		TNHC	92262	Male	176		Bamberger Ranch, Blanco Co., TX	1	2	0	9	0	1	1-L,1-R	0	22-L,23-R	8-L,7-R	3-L,2-R	0	0	0	0	1	1	0-L,1-R	1	0	0	1	1	4-L,4-R	0	1	0	1	0	0	1	0	0	1	0	0	0	0	0	0	0
Gerrhonotus	infernalis		TxVP	13441	?	144		Austin, TX	?	2	1	9	0	?	1-L,2-R	0	21-L, ?-R	7-L, ?-R	2-L,2-R	0	?	?	?	0	?	0	0 to 1	?	?	?	1	2-L,2-R	?	?	1	1	0	?	?	0	0	1	0	0	0	0	0	?	0
Gerrhonotus	liocephalus		TCWC	8585	?	135		Acahuizotla, Guerrero, Mexico	0	2	0	9	0	0	1-L,1-R	0	22-L,21-R	5-L,7-R	2-L,2-R	1	0	0	1-L, 0-R	1	0	0	1	1	0	0	1	4-L,4-R	0	1	1-L, 0-R	2	1	0	1	0	0	1	0	0	0	0	0	0	0
Gerrhonotus	liocephalus		TCWC	9896	?	77		Acahuizotla, Guerrero, Mexico	0	2	0	9	0	0	2-L,2-R	0	17-L,17-R	5-L,7-R	2-L,2-R	1	0	0	0	0	0	1	?	1	0	0	1	3-L,3-R	0	1	0	2	0	0	1	0	0	1	0	0	0	0	0	0	0
Gerrhonotus	lugoi		LACM	116254	Female	84		Coahuila, Mexico	1	2	0	9	1	1	2-L,2-R	1	18-L,19-R	6-L,7-R	2-L,2-R	1	1	1	0	1	0	1	1	0	0	0	1	2-L,2-R	0	0	0	2	0	0	1	1	1-L,0-R	1	0	0	0	0	0	1	0
Gerrhonotus	lugoi		CM	49012	Female	79	Holotype	11 km SW of Cuatro Cienegas de Carranza, Coahuila, Mexico,	1	0	0	9	1	1	1-L,1-R	1-L, 0-R	17-L,16-R	6-L,6-R	2-L,2-R	1	1	1	0	1	0	0	1	1	0	0	1	1-L,3-R	0	0	0	2	0	0	1	1	0	1	0	0	0	0	0	0	0
Gerrhonotus	ophiurus		TCWC	35604	?	114		33.8 mi W Valles, San Luis Potosí, Mexico	0	2	0	9	0	1	1-L,1-R	0	21-L,21-R	7-L,7-R	3-L, 2-R	1	0	0	0	1	0	0	0	1	1	0	1	3-L,3-R	0	1	1	1	0	0	1	0	0	1	1-L, 0-R	0	0	0	0	0	0
Gerrhonotus	parvus		SRSU	5537	Female	72	Paratype	Nuevo Leon, Mexico 1 km S Galeana	1	0	0	9	1	0	1-L,1-R	0	16-L,16-R	6-L,6-R	2-L,2-R	0	0	0	1	1	0	0	1	2	0	0	?	?	0	0	0	?	?	1	?	0	0	?	?	?	1	0	0	?	0
Gerrhonotus	parvus		SRSU	5538	Female	55	Holotype	Nuevo Leon, Mexico, 3 km SE Galeana	1	0	0	9	1	0	1-L,1-R	0	18-L,18-R	5-L,5-R	2-L,2-R	0	0	0	0	1	0	0	1	1	0	0	1	4-L,2-R	0	0	0	1	0	0	1	0	0	1	0	0	1	0	0	0	0
[truncated: 22 more columns]
